# Supplementary material
Source: PubMed Central journal article supplement (PMC6514615)
Supplement: supp_RA118.007347_142845_1_supp_291394_pnhbsl.pdf [file supp_RA118.007347_142845_1_supp_291394_pnhbsl.pdf]

**Proteolytic dynamics of human 20S thymoproteasome**Ulrike Kuckelkorn *et al.*

|                  |                                                                                                                             |
|------------------|-----------------------------------------------------------------------------------------------------------------------------|
| <b>Table S1</b>  | Synthetic substrates investigated by <i>in vitro</i> proteasomal digestions                                                 |
| <b>Table S2</b>  | AQUA peptides used for the relative quantification of $\beta 5$ and $\beta 5t$ subunits in the purified C5.5 20S proteasome |
| <b>Figure S1</b> | Suc-LLVY-MCA degradation and the corresponding model fits                                                                   |
| <b>Figure S2</b> | Z-LLE-MCA degradation and the corresponding model fits                                                                      |
| <b>Figure S3</b> | Computational model parameters of the 20S proteasome isoform dynamics for the substrate Z-LLE-MCA                           |

| Polypeptide substrate    | sequence                          | Antigen                                    | Type of MS analysis                              |
|--------------------------|-----------------------------------|--------------------------------------------|--------------------------------------------------|
| gp100 <sub>40-52</sub>   | RTKAWNRQLYPEW                     | gp100 <sup>PMEL17</sup>                    | peptide identification and quantitative kinetics |
| gp100 <sub>35-57</sub>   | VSRQLRTKAWNRQLYPEWTEAQR           | gp100 <sup>PMEL17</sup>                    | peptide identification and quantitative kinetics |
| gp100 <sub>201-230</sub> | AHSSSAFTITDQVPFSVSVSQLRALDGGNK    | gp100 <sup>PMEL17</sup>                    | peptide identification and quantitative kinetics |
| MBP <sub>102-129</sub>   | PSQGKGRGLSLSRFSWGAEGQRPGFGYG      | myelin basic protein (MBP) isoform 5       | peptide identification and quantitative kinetics |
| MAG <sub>543-576</sub>   | TESPFSAGDNPPVLFSSDFRISGAPEKYESERR | myelin associated glycoprotein (MAG)       | peptide identification                           |
| MAG <sub>498-528</sub>   | SLELPFQGAHRLMWAKIGPVGAVVAFALIA    | MAG                                        | peptide identification                           |
| MOG <sub>93-122</sub>    | EYRGRTELLKDAIGEGKVTLRIRNVRFSD     | myelin oligodendrocytes glycoprotein (MOG) | peptide identification                           |
| MOG <sub>172-202</sub>   | GLIFLCLQYRLRGKLRAEIENLHRTFDPHFL   | MOG                                        | peptide identification and quantitative kinetics |

**Table S1. Synthetic substrates investigated by *in vitro* proteasomal digestions.**

| 20S proteasome subunit | position | Sequence (upon tryptic digestion) | [M+H] <sup>+</sup> | AQUA peptide sequence        | [M+H] <sup>+</sup> (AQUA-Peptide) |
|------------------------|----------|-----------------------------------|--------------------|------------------------------|-----------------------------------|
| PSB5 human (β5)        | 226-239  | DAYSGGAVNLYHVR                    | 1521.7             | DAYSGGAVNL <sup>7</sup> YHVR | 1528.7                            |
| PSB11 human (β5t)      | 216-229  | DAYSGGSVDLFHVR                    | 1522.7             | DAYSGGSVDL <sup>7</sup> FHVR | 1529.7                            |

**Table S2. AQUA peptides used for the relative quantification of β5 and β5t subunits in the purified C5.5 20S proteasome.** Criteria for selection of peptide sequences: high MS intensity and significant MS/MS ion score in protein identification experiment, no modifiable amino acids, different HPLC retention times between the peptides specific for the two subunits.

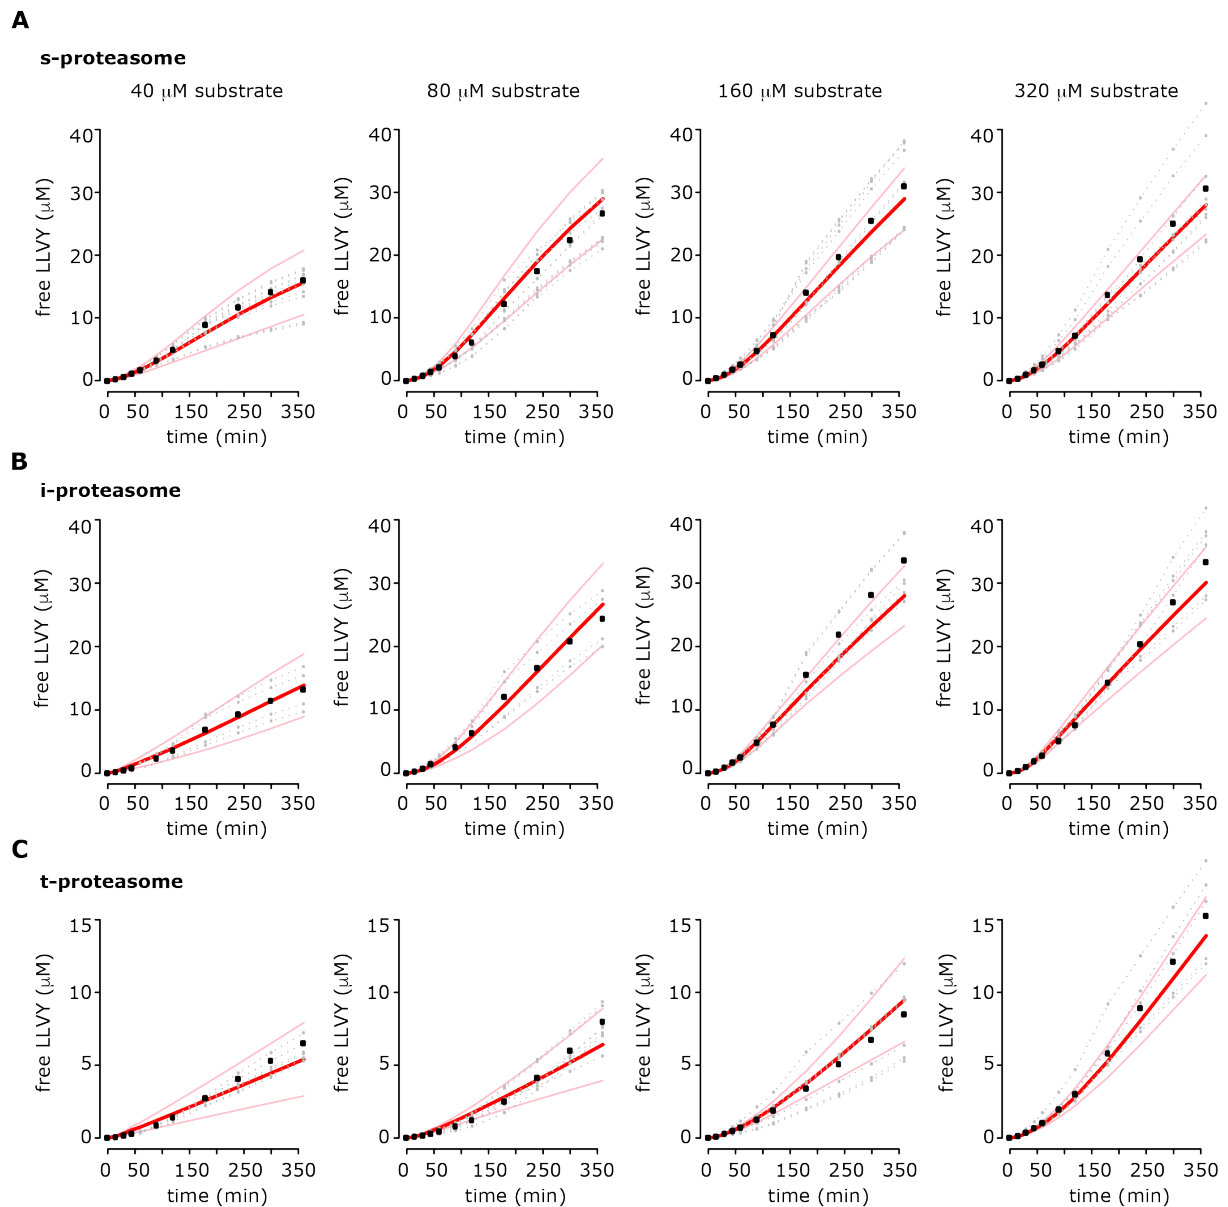

**Figure S1. Suc-LLVY-MCA degradation and the corresponding model fits.** The experimental data and the corresponding model fits obtained from the degradation of Suc-LLVY-MCA with purified human 20S s- (**A**), i- (**B**) or t-proteasomes (**C**) are depicted. Shown is the time course of 3-5 independent experiments (grey dashed dotted lines), the mean of those independent experiments (black dots), the mean of the obtained model fits (red lines) and the 5% and 95% confidence intervals of the model fits (pink lines).

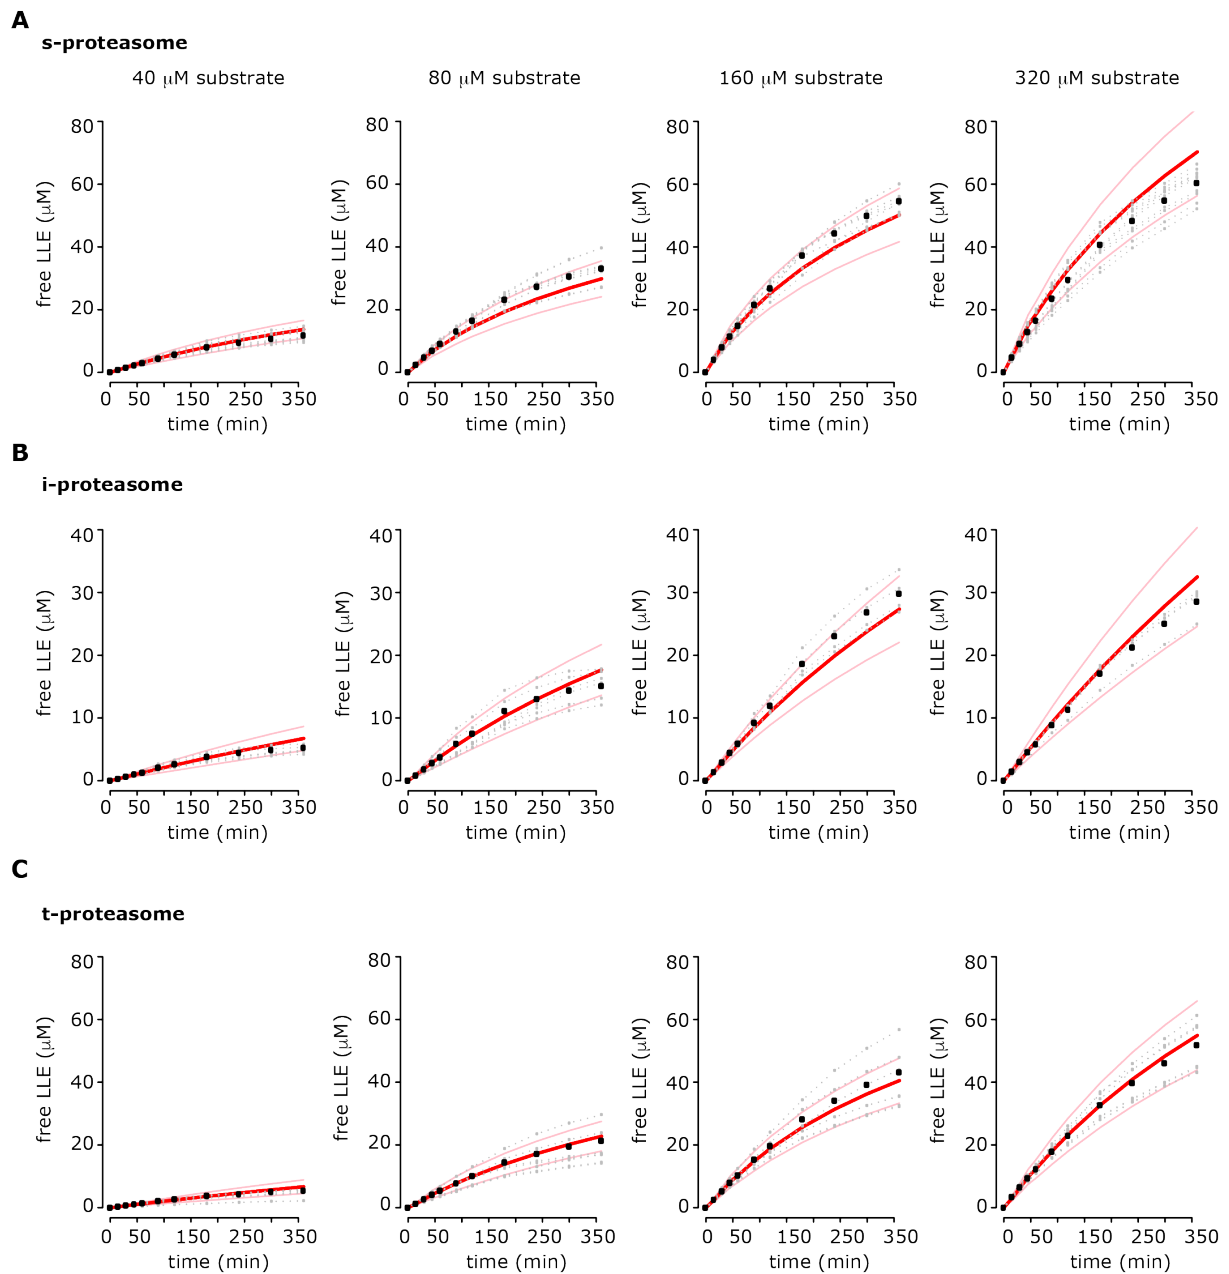

**Figure S2. Z-LLE-MCA degradation and the corresponding model fits.** The experimental data and the corresponding model fits obtained from the degradation of Z-LLE-MCA with 20S s- (**A**), i- (**B**) and t-proteasomes (**C**) are depicted. Shown is the time course of 3-5 independent experiments (grey dashed dotted lines), the mean of those independent experiments (black dots), the mean of the obtained model fits (red lines) and the 5% and 95% confidence intervals of the model fits (pink lines).

**A****Active site related parameters**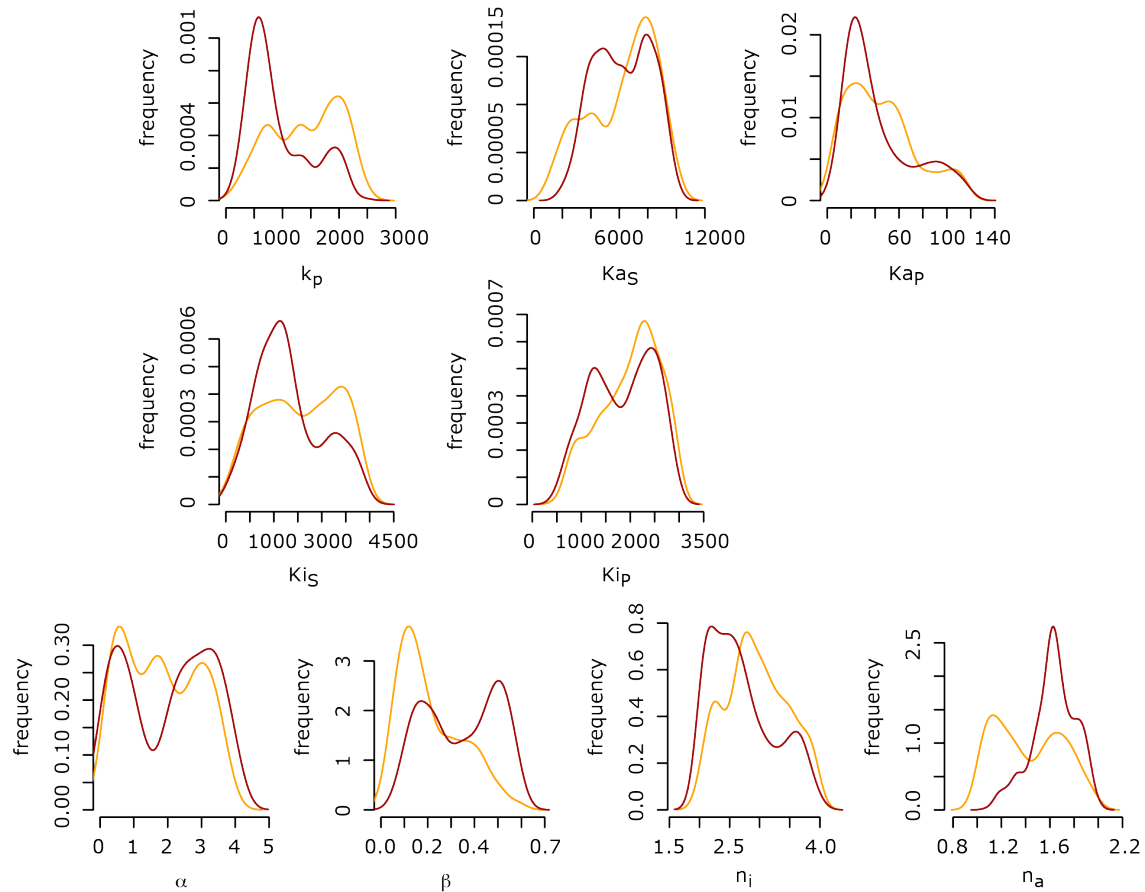**B****Transport and transport regulation related parameters**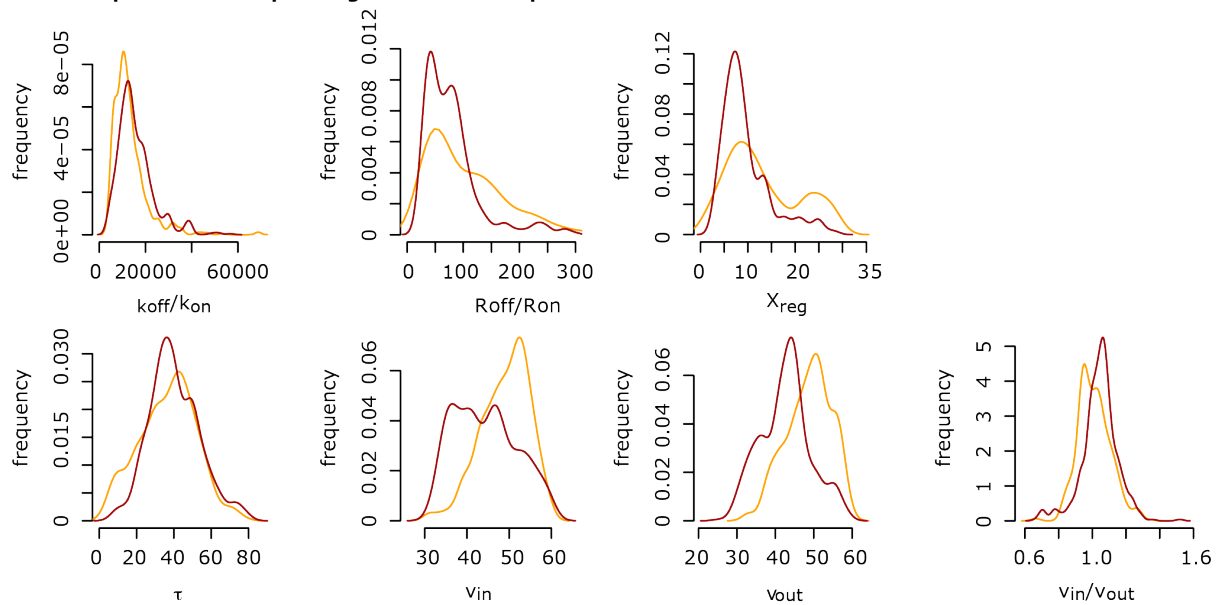

**Figure S3. Computational model parameters of the 20S proteasome isoform dynamics for the substrate Z-LLE-MCA.** It is shown the marginal posterior parameter distribution obtained from calibrating the proteasome kinetics model against experimental data obtained from the degradation of Z-LLE-MCA ( $n=3-5$ ) with 20S i- and t-proteasome (yellow and brown, respectively). Parameters are grouped into active site relative parameters (**A**) and transport and transport regulation related parameters (**B**). The meaning of the parameters is explained in **Fig. 2A** and **Table 1**.
